# Supplementary material
Source: PubMed Central journal article supplement (PMC2879921)
Supplement: supp_mol.109.062596_Ding_et_al_Data_Supplement_160210.pdf [file supp_mol.109.062596_Ding_et_al_Data_Supplement_160210.pdf]

# Binding of IP<sub>3</sub> and Adenophostin A to the N-terminal of the IP<sub>3</sub> Receptor: Thermodynamic Analysis Using Fluorescence Polarization with a Novel IP<sub>3</sub> Receptor Ligand

## Data Supplement

A

| Primer | Sequence                                                                           |
|--------|------------------------------------------------------------------------------------|
| P1     | CGGGATCCATGTCTGACAAAATGTCTAGT                                                      |
| P2     | CGCGCTCGAGTCACTTTCGGTTGTTGTGGA                                                     |
| P3     | CGGGATCCATGAAATGGAGTAACAAAG                                                        |
| P4     | ATTACTTGGCAGCAGAGGTAGACCCTGACTTTGAGGAAGAATGCCTGGAGTTTCAGCCCTCA<br>GTGGACCCTGATCAGG |
| P5     | GATCAGGGTCCACTGAGGGCTGAAACTCCAGGCATTCTTCCTCAAAGTCAGGGTCTACCTCT<br>GCTGCCAAGTAATGC  |

B

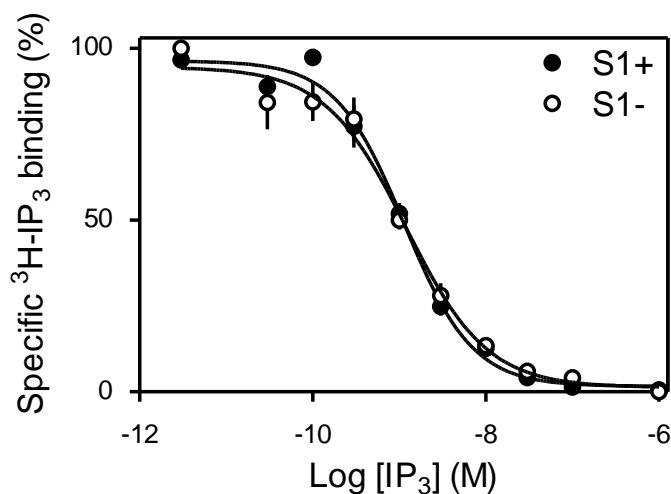

**Supplemental Fig. 1.** Preparation of plasmids encoding NT and IBC. Primers used to generate the plasmids encoding the IBC and NT (A). Specific <sup>3</sup>H-IP<sub>3</sub> binding (0.25 nM) in TEM to the IBC with (S1<sup>+</sup>) or without (S1<sup>-</sup>) the S1 splice region (B). Results are means ± S.E.M., n ≥ 4.

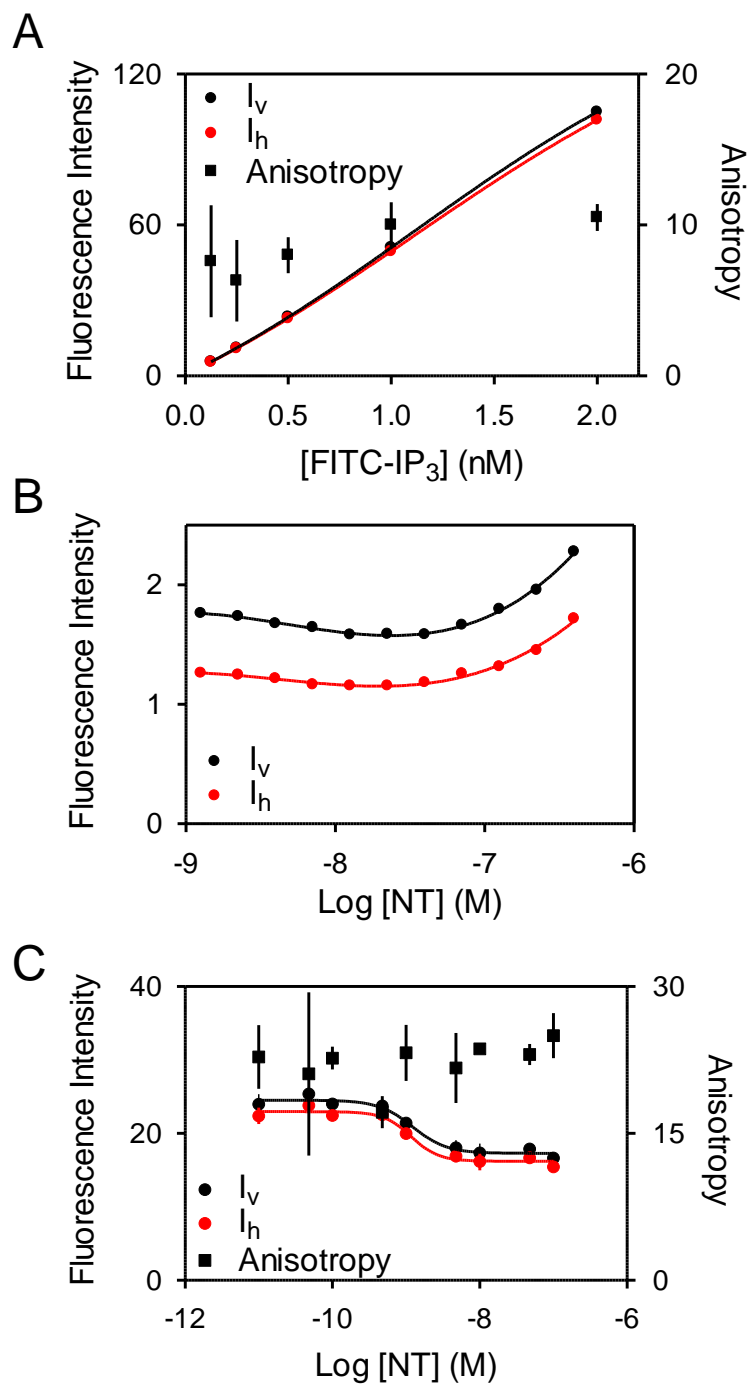

**Supplemental Fig. 2.** Optimizing signal-noise for FP assay of ligand binding to IP<sub>3</sub>R in CLM. Emitted fluorescence in the vertical (I<sub>v</sub>) and horizontal (I<sub>h</sub>) planes and anisotropy (A) were measured for the indicated concentrations of free FITC-IP<sub>3</sub> (A). Across a 16-fold range of FITC-IP<sub>3</sub> concentration, there is a linear relationship between fluorescence (I<sub>v</sub> and I<sub>h</sub>) and no significant difference in anisotropy. The results demonstrate that with an even lower concentration of FITC-IP<sub>3</sub> (0.125 nM) than used in our assays (0.5 nM), background fluorescence does not perturb measurements of A. Fluorescence in the vertical (I<sub>v</sub>) and horizontal (I<sub>h</sub>) planes from the indicated concentrations of NT in the absence of FITC-IP<sub>3</sub> (B). These results demonstrate that at the highest protein concentrations used in saturation binding experiments (Fig. 3A), the contribution from background fluorescence is <15% of the total signal (which derives largely from bound FITC-IP<sub>3</sub>). Because this protein fluorescence is unrelated to FITC-IP<sub>3</sub>, all measurements were corrected for the small background signal by measuring I<sub>v</sub> and I<sub>h</sub> from a parallel sample of protein without FITC-IP<sub>3</sub>. The effects of protein (NT at the indicated concentrations) on the emitted fluorescence (I<sub>v</sub> and I<sub>h</sub>) from free FITC-IP<sub>3</sub> (0.5 nM) was measured in the presence of 10 μM IP<sub>3</sub> (to ensure that FITC-IP<sub>3</sub> is displaced from all IP<sub>3</sub>-binding sites) (C). Because quenching was the same in all planes, A was unaffected by increasing [NT]. This quenching effect does not therefore affect experimental measurements of A; no correction was therefore required.

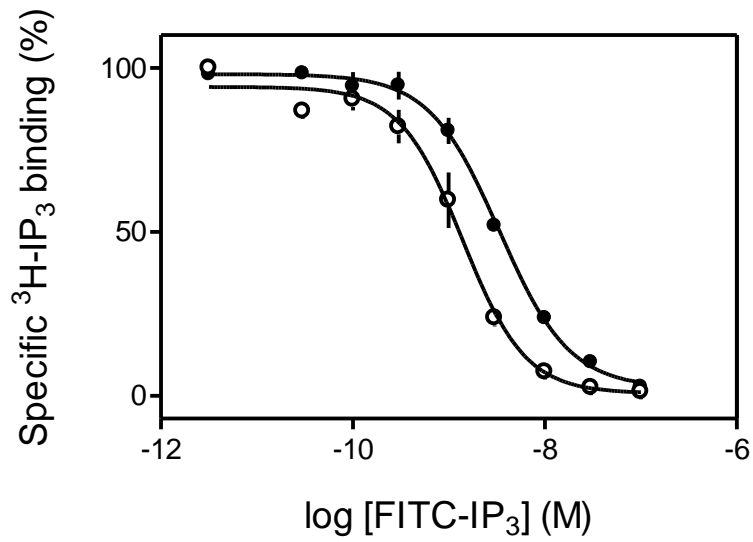

**Supplemental Fig. 3.** Specific binding of  $^3\text{H-IP}_3$  to the NT (○) and full-length  $\text{IP}_3\text{R}$  (●) in TEM in the presence of the indicated concentrations of FITC- $\text{IP}_3$ . The  $^3\text{H-IP}_3$  concentrations used were 0.75 nM and 1 nM for the NT and full-length  $\text{IP}_3\text{R}$ , respectively. Results are means  $\pm$  S.E.M, n = 3.

A

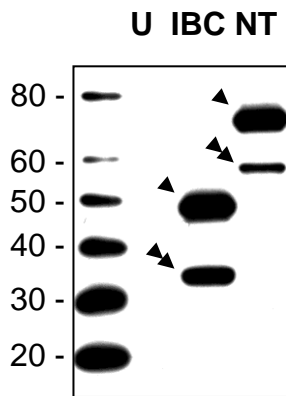

B

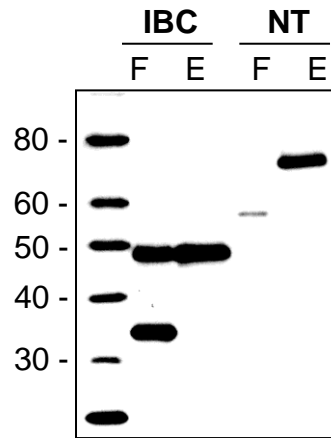

**Supplemental Fig. 4. Expression of N-terminal fragments of IP<sub>3</sub>R1 and elution from heparin columns.** Lanes were loaded with lysate (5 µg of protein) from untransformed bacteria (U) and bacteria expressing N-terminally His<sub>6</sub>-tagged IBC and NT fragments of IP<sub>3</sub>R1. Bands were detected with anti-His<sub>6</sub> antibody. Arrows denote the bands corresponding to the full-length constructs with the expected mass; double arrows show bands of lower molecular mass, which may be truncated versions or degradation products (A). Full-length IP<sub>3</sub>R and its N-terminal fragments are retained on a heparin-agarose column in the presence of 0.25 M NaCl and are then eluted with 0.5 M NaCl (not shown). Bacterial lysates of IBC and NT in 0.25 M NaCl were passed over heparin-agarose columns and samples were collected from the flow-through fraction (labelled F) and after elution (labelled E) with 0.5 M NaCl. Fragments were visualised by immunoblotting with an anti-His<sub>6</sub> antibody. Whereas bands with the mobilities expected of the full-length fragments were retained on the heparin column, smaller fragments were collected entirely in the flow-through fraction). We conclude that the lower molecular mass proteins are unlikely to bind IP<sub>3</sub> because they do not bind to heparin (B). Representative blots of at least 3 independent experiments are shown. Molecular weight markers are shown on the left of each blot.

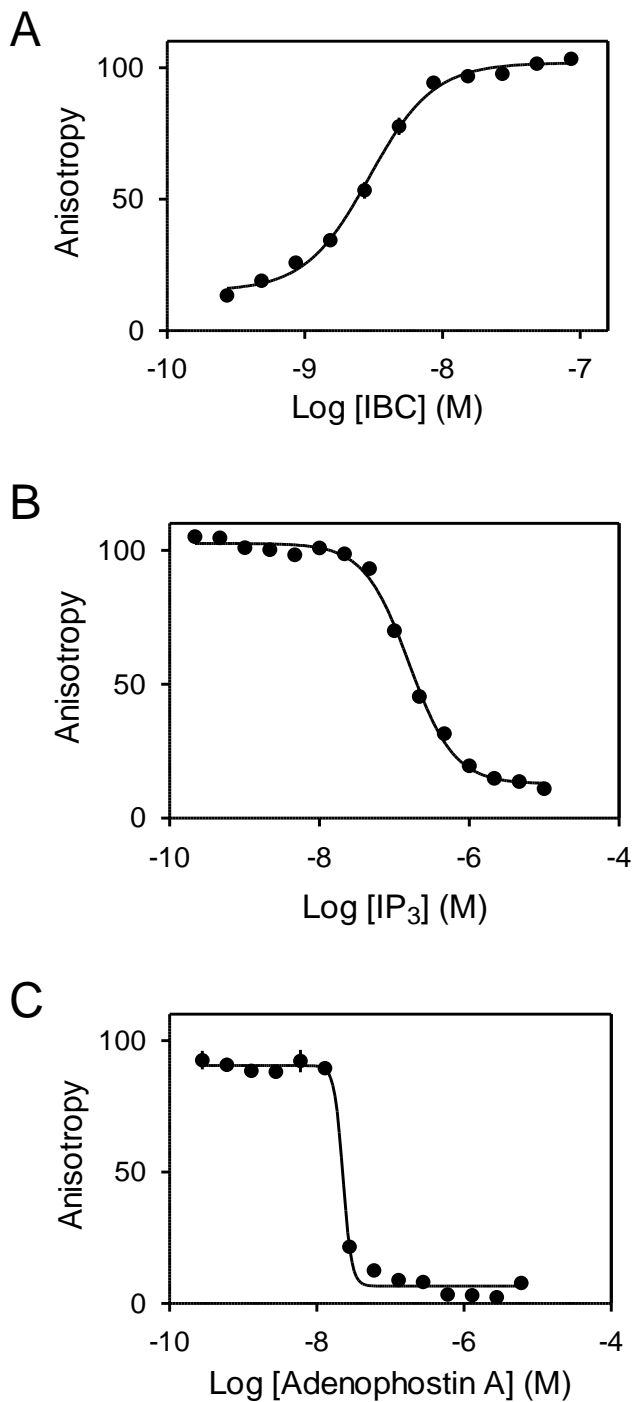

**Supplemental Fig. 5.** FITC-IP<sub>3</sub>, IP<sub>3</sub> and adenophostin A binding to the IBC analysed by FP in CLM. FP experiment at 4°C using 0.5 nM FITC-IP<sub>3</sub> and showing corrected *A* as a function of increasing concentrations of the IBC (A). FP competition binding assay with FITC-IP<sub>3</sub> (0.5 nM), IBC (15 nM) and the indicated concentrations of IP<sub>3</sub> (B) or adenophostin A (C). Results are means ± S.E.M., n = 3. Equivalent analyses with the NT are shown in Fig. 3.

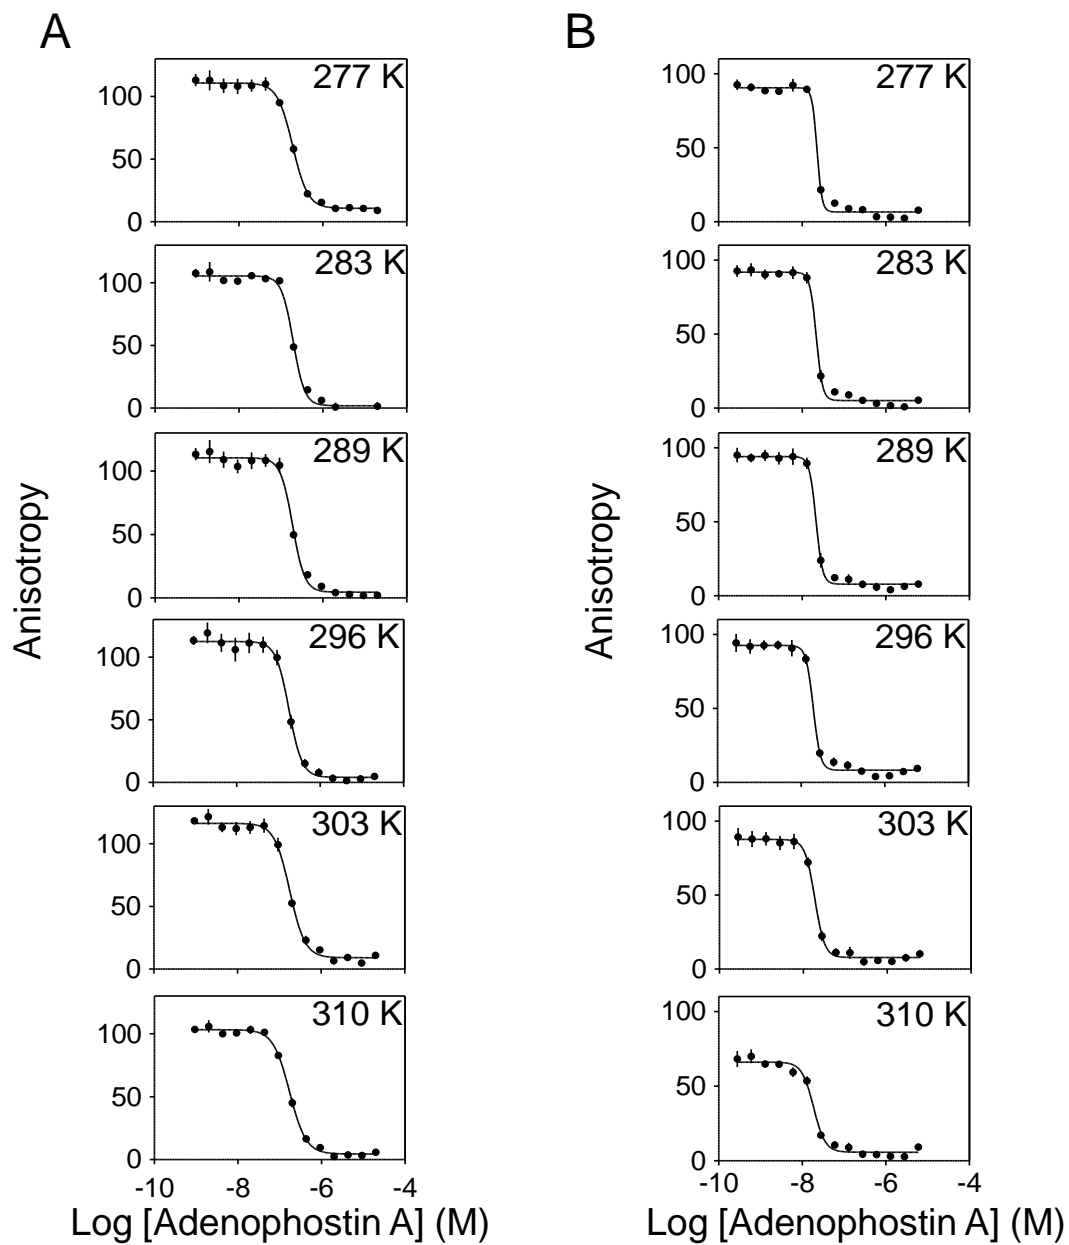

**Supplemental Fig. 6.** Effects of temperature on adenophostin A binding in CLM. FP competition binding assays with FITC-IP<sub>3</sub> (0.5 nM) and adenophostin A and the NT (A, 80 nM) or IBC (B, 15 nM) at the indicated temperatures. Results are means  $\pm$  S.E.M., n = 3. Similar analyses for IP<sub>3</sub> are shown in Fig. 4, and the results are summarized in Table 4.

**Supplemental Table 1**

Thermodynamics of IP<sub>3</sub> and adenophostin A binding to the NT and IBC analysed without assuming that  $\Delta C$  is zero.

From the effects of temperature on IP<sub>3</sub> and adenophostin A binding to the IBC and NT in CLM (Table 4, Fig. 4 and Supplemental Fig. 6),  $\Delta G$  (equation 10) was determined and thereby  $\Delta H$ ,  $\Delta C$  and  $\Delta S$  (equation 11).  $-T\Delta S$  is also shown for 296 K. Results are means  $\pm$  S.E.M., n = 3.

|                 |     | $\Delta G$<br>kJ/mol<br>(296 K) | $\Delta H$<br>kJ/mol<br>(296 K) | $\Delta C$<br>J/mol.K | $\Delta S$<br>J/mol.K<br>(296 K) | $-T\Delta S$<br>kJ/mol<br>(296 K) |
|-----------------|-----|---------------------------------|---------------------------------|-----------------------|----------------------------------|-----------------------------------|
| IP <sub>3</sub> | NT  | -37.1 $\pm$ 0.2                 | -35.9 $\pm$ 1.4                 | 319 $\pm$ 65          | 4.4 $\pm$ 4.6                    | -1.3 $\pm$ 1.4                    |
|                 | IBC | -43.2 $\pm$ 0.2                 | -37.8 $\pm$ 0.2                 | -425 $\pm$ 72         | 18.1 $\pm$ 0.4                   | -5.4 $\pm$ 0.1                    |
| Adenophostin A  | NT  | -43.5 $\pm$ 0.03                | -30.9 $\pm$ 1.5                 | 170 $\pm$ 196         | 42.6 $\pm$ 5.0                   | -12.6 $\pm$ 1.5                   |
|                 | IBC | -49.4 $\pm$ 0.3                 | -18.7 $\pm$ 1.6                 | 1026 $\pm$ 206        | 103.4 $\pm$ 5.2                  | -30.6 $\pm$ 1.5                   |
